# Supplementary material for: Large-scale cranial window for in vivo mouse brain imaging utilizing fluoropolymer nanosheet and light-curable resin
Source: PubMed Central journal article supplement (PMC10912766; doi:10.1038/s42003-024-05865-8), 2024-03-04
Supplement: 42003_2024_5865_MOESM1_ESM.pdf [file 42003_2024_5865_MOESM1_ESM.pdf]

## 1 **Supplementary Information**

2           Large-scale cranial window for *in vivo* mouse brain imaging utilizing  
3                           fluoropolymer nanosheet and light-curable resin

## 4 **Authors and Affiliations**

5 Taiga Takahashi<sup>1,2,3,4</sup>, Hong Zhang<sup>5,6</sup>, Masakazu Agetsuma<sup>7,8</sup>, Junichi  
6 Nabekura<sup>3,7</sup>, Kohei Otomo<sup>1,2,3,9</sup>, Yosuke Okamura<sup>5,10,11</sup>, Tomomi Nemoto<sup>1,2,3 \*</sup>

7

- 8 **1.** Division of Biophotonics, National Institute for Physiological Sciences, National  
9 Institutes of Natural Sciences, Higashiyama 5-1, Myodaiji, Okazaki, Aichi, 444-8787,  
10 Japan;
- 11 **2.** Biophotonics Research Group, Exploratory Research Center on Life and Living  
12 Systems (ExCELLS), National Institutes of Natural Sciences, Higashiyama 5-1,  
13 Myodaiji, Okazaki, Aichi, 444-8787, Japan;
- 14 **3.** School of Life Science, The Graduate University for Advanced Studies (SOKENDAI),  
15 Higashiyama 5-1, Myodaiji, Okazaki, Aichi, 444-8787, Japan;
- 16 **4.** Department of Medical and Robotic Engineering Design, Faculty of Advanced  
17 Engineering, Tokyo University of Science, 6-3-1 Niijuku, Katsushika, Tokyo 125-  
18 8585, Japan;
- 19 **5.** Micro/Nano Technology Center, Tokai University, 4-1-1 Kitakaname, Hiratsuka,  
20 Kanagawa 259-1292, Japan;
- 21 **6.** School of Chemical Engineering and Technology, Tianjin University, 135 Yaguan  
22 Road, Jinnan District, Tianjin 300350, China;
- 23 **7.** Division of Homeostatic Development, National Institute for Physiological Sciences,

- 24 National Institutes of Natural Sciences, Okazaki, 444-8585, Japan;
- 25 **8.** Quantum Regenerative and Biomedical Engineering Team, Institute for Quantum  
26 Life Science, Anagawa 4-9-1, Chiba Inage-ku, Chiba 263-8555, Japan;
- 27 **9.** Department of Biochemistry and Systems Biomedicine, Graduate School of  
28 Medicine, Juntendo University, 2-1-1 Hongo, Bunkyo-ku, Tokyo 113-8421, Japan;
- 29 **10.** Department of Applied Chemistry, School of Engineering, Tokai University, 4-1-1  
30 Kitakaname, Hiratsuka, Kanagawa 259-1292, Japan;
- 31 **11.** Course of Applied Science, Graduate School of Engineering, Tokai University, 4-1-1  
32 Kitakaname, Hiratsuka, Kanagawa 259-1292, Japan;

33

34 Correspondence author and Lead Contact: Tomomi Nemoto ([tn@nips.ac.jp](mailto:tn@nips.ac.jp))

35

36

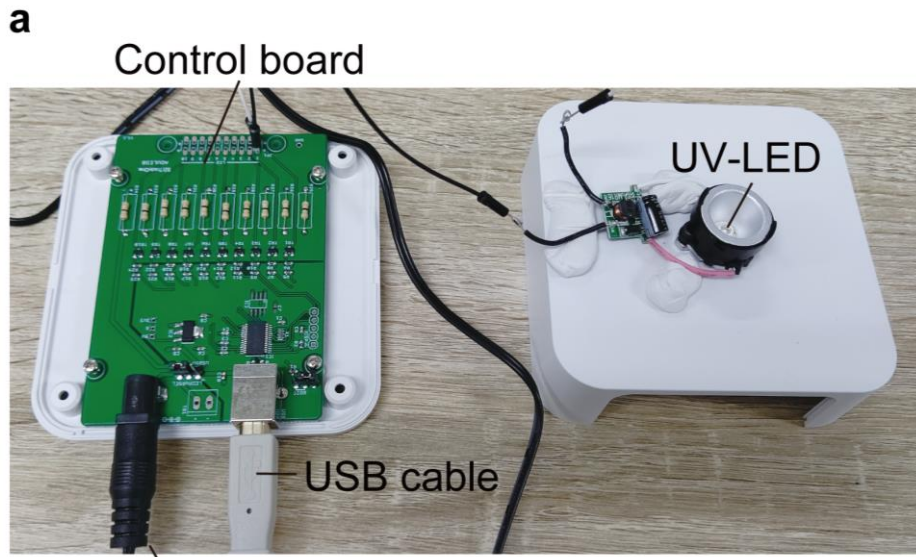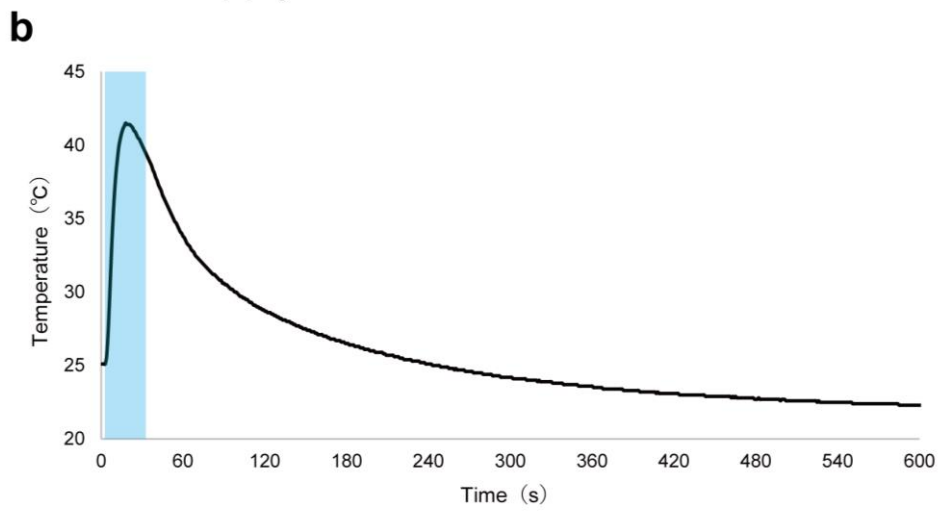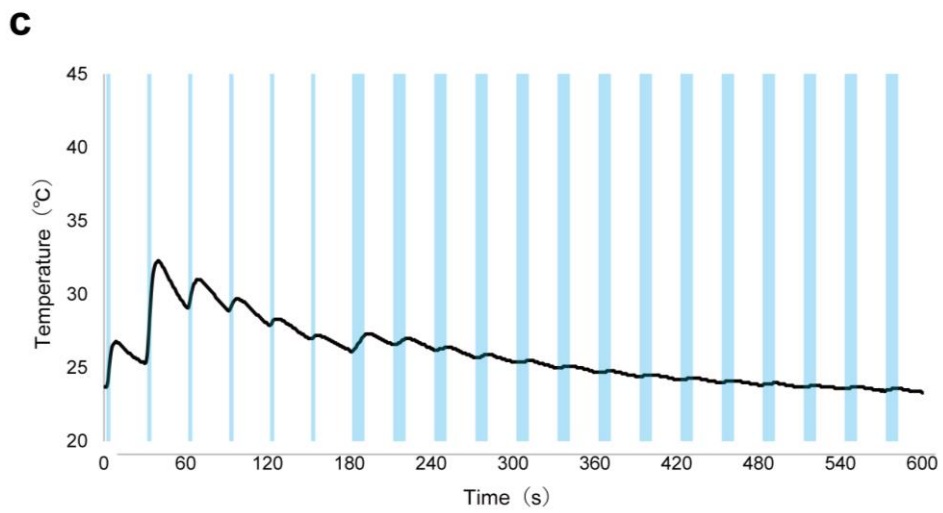

38 **Supplementary Figure 1. Time and power programmable UV irradiation**  
39 **system.**

40 **a.** Photograph of the handmade programmable UV irradiator.

41 **b.** Temperature changes over 30 seconds of continuous UV irradiation to fix the  
42 light-curable resin. The blue bar indicates the irradiation ON periods.

43 **c.** Temperature changes due to intermittent UV irradiation. The light-curable  
44 resin was irradiated at intervals of 2 seconds every 30 seconds for 3 minutes  
45 and then for 10 seconds every 30 seconds for 7 minutes. Blue bars indicated  
46 irradiation ON periods.

47

48

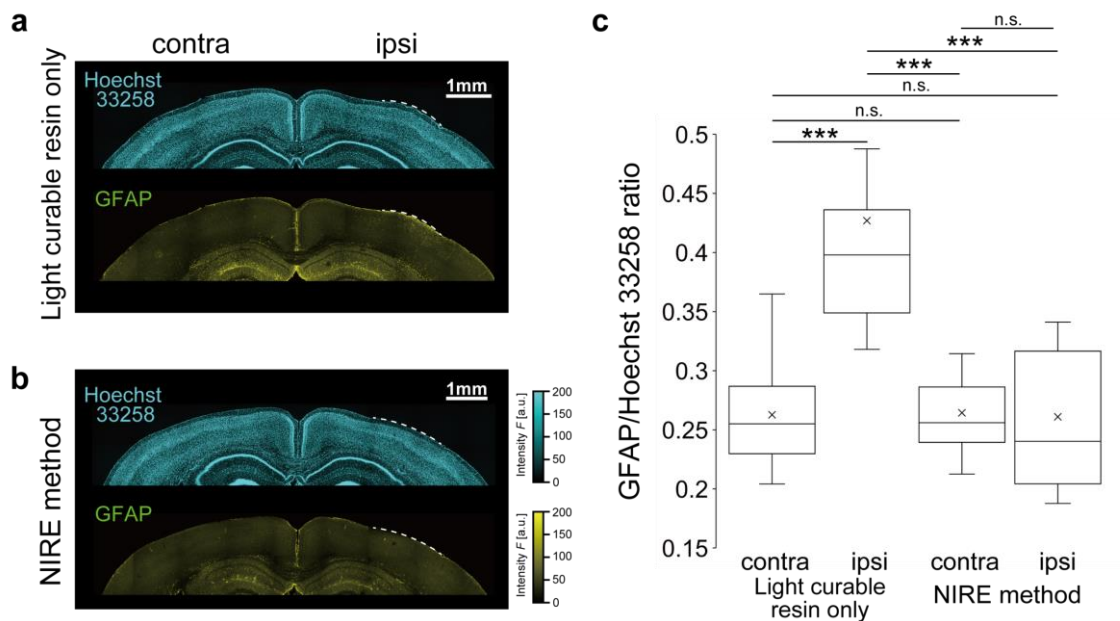

49

50 **Supplementary Figure 2. Evaluation of neuroinflammation caused by**  
 51 **the NIRE method.**

52 **a.** Immunostaining of astrocytes using anti-GFAP and nuclear counterstaining  
 53 in a brain slice obtained 4 weeks after craniectomy and covering with light-  
 54 curable resin only (without a PEO-CYTOP nanosheet). The white dashed line  
 55 indicates the region where the skull was removed and the resin was fixed.

56 **b.** Immunostaining of astrocytes using anti-GFAP and nuclear counterstaining  
 57 in a brain slice obtained 4 weeks after craniectomy and the NIRE method.  
 58 The white dashed line indicates the region where the skull was removed and  
 59 the resin was fixed.

60 **c.** Box plots showing the ratio of mean GFAP to Hoechst 33258 signal per  
 61  $300 \times 300 \mu\text{m}^2$  in the ipsilateral region and contralateral region (15 ROIs from  
 62 three mice in each condition). \*\*\* $p < 0.005$  by Welch's t-test with Bonferroni  
 63 correction.

64

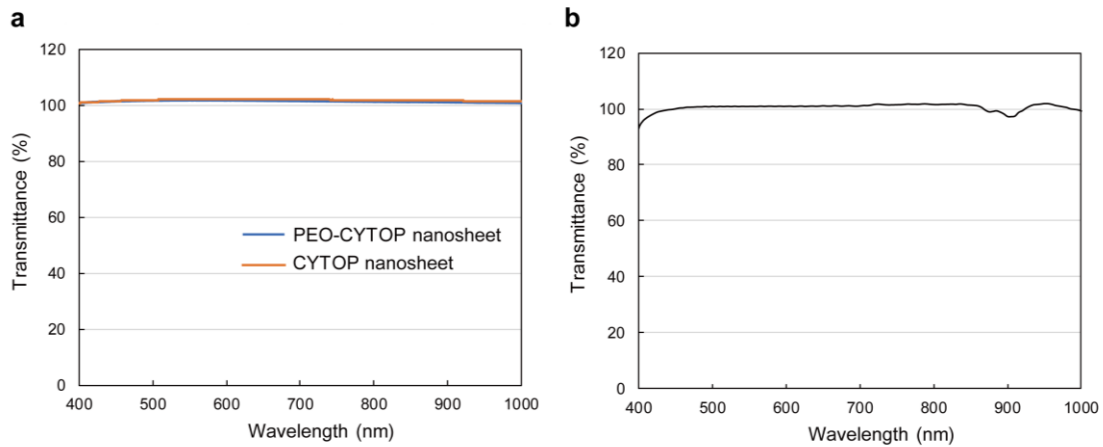

65

66

67

**Supplementary Figure 3. Transmittance of the PEO-CYTOP**

68

**nanosheets and the light curable resin used in the NIRE method**

69

**a.** Transmittance in the wavelength from 400 to 1000 nm of the CYTOP and

70

PEO-CYTOP nanosheet.

71

**b.** Transmittance in the wavelength from 400 to 1000 nm of the light curable

72

resin (NOA83H) used in the NIRE method.

73

74

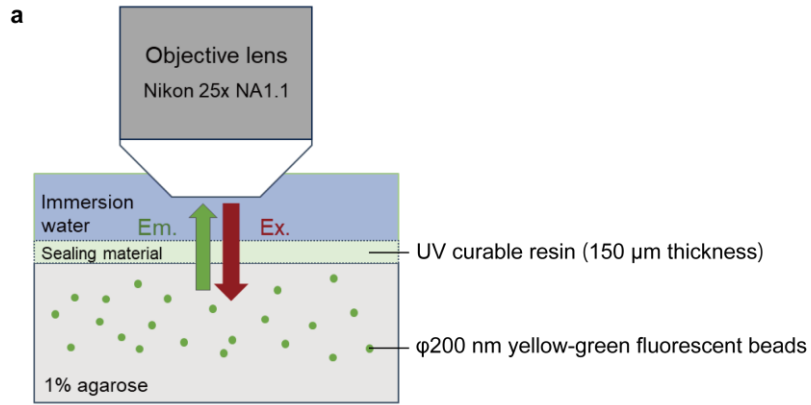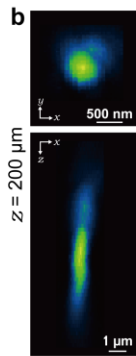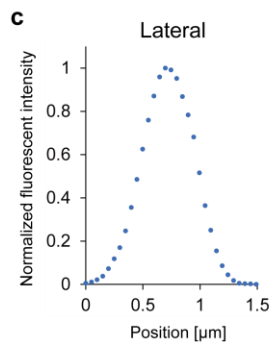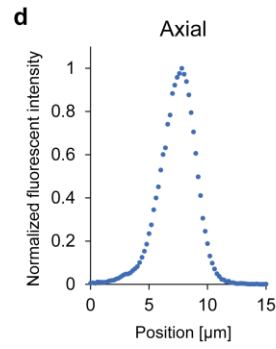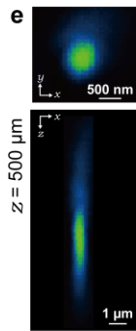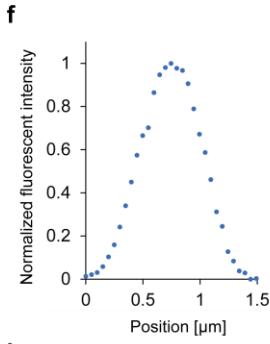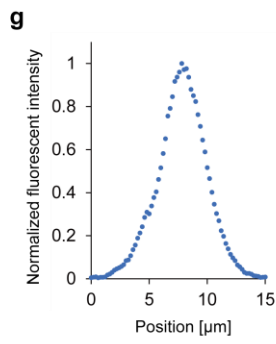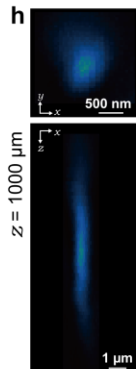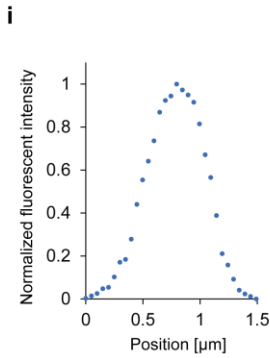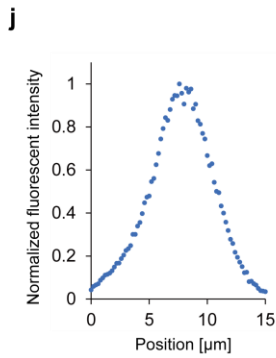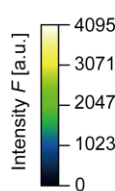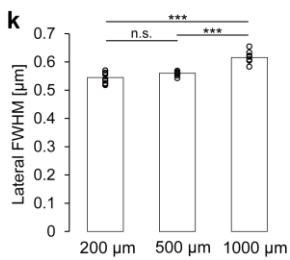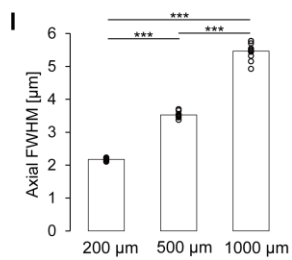

- 76 **Supplementary Figure 4. Evaluation of spatial resolution through the**  
77 **light curable resin using fluorescent beads in an agarose gel.**
- 78 **a.** Schematic illustration of the measurement for evaluation of the spatial  
79 resolution through the light-curable resin.
- 80 **b.** Fluorescence images of 200-nm yellow-green beads at a depth of 200  $\mu\text{m}$   
81 acquired through the light-curable resin. Top image: xy plane. Bottom image:  
82 xz plane.
- 83 **c.** Lateral normalized fluorescence intensity of 200-nm yellow-green beads at a  
84 depth of 200  $\mu\text{m}$  acquired through the light-curable resin.
- 85 **d.** Axial normalized fluorescence intensity of 200-nm yellow-green beads at a  
86 depth of 200  $\mu\text{m}$  acquired through the light-curable resin.
- 87 **e.** Fluorescence images of 200-nm yellow-green beads at a depth of 500  $\mu\text{m}$   
88 acquired through the light-curable resin. Top image: xy plane. Bottom image:  
89 xz plane.
- 90 **f.** Lateral normalized fluorescence intensity of 200-nm yellow-green beads at a  
91 depth of 500  $\mu\text{m}$  acquired through the light-curable resin.
- 92 **g.** Axial normalized fluorescence intensity of 200-nm yellow-green beads at a  
93 depth of 500  $\mu\text{m}$  acquired through the light-curable resin.
- 94 **h.** Fluorescence images of 200-nm yellow-green beads at a depth of 1000  $\mu\text{m}$   
95 acquired through the light-curable resin. Top image: xy plane. Bottom image:  
96 xz plane.
- 97 **i.** Lateral normalized fluorescence intensity of 200-nm yellow-green beads at a  
98 depth of 1000  $\mu\text{m}$  obtained through the light-curable resin.



- 99    **j.** Axial normalized fluorescence intensity of 200-nm yellow-green beads at a  
100        depth of 1000  $\mu\text{m}$  obtained through the light-curable resin.
- 101    **k.** Average lateral FWHMs measured from the intensity profiles of bead images  
102        at depths of 200, 500, and 1000  $\mu\text{m}$ ; \*\*\* $p < 0.005$  by Welch's t-test with  
103        Bonferroni correction. Error bars represent standard error of the mean.
- 104    **l.** Averaged axial FWHMs measured from the intensity profiles of bead images  
105        at depths of 200, 500, and 1000  $\mu\text{m}$ ; \*\*\* $p < 0.005$  by Welch's t-test with  
106        Bonferroni correction. Error bars represent standard error of the mean.
- 107

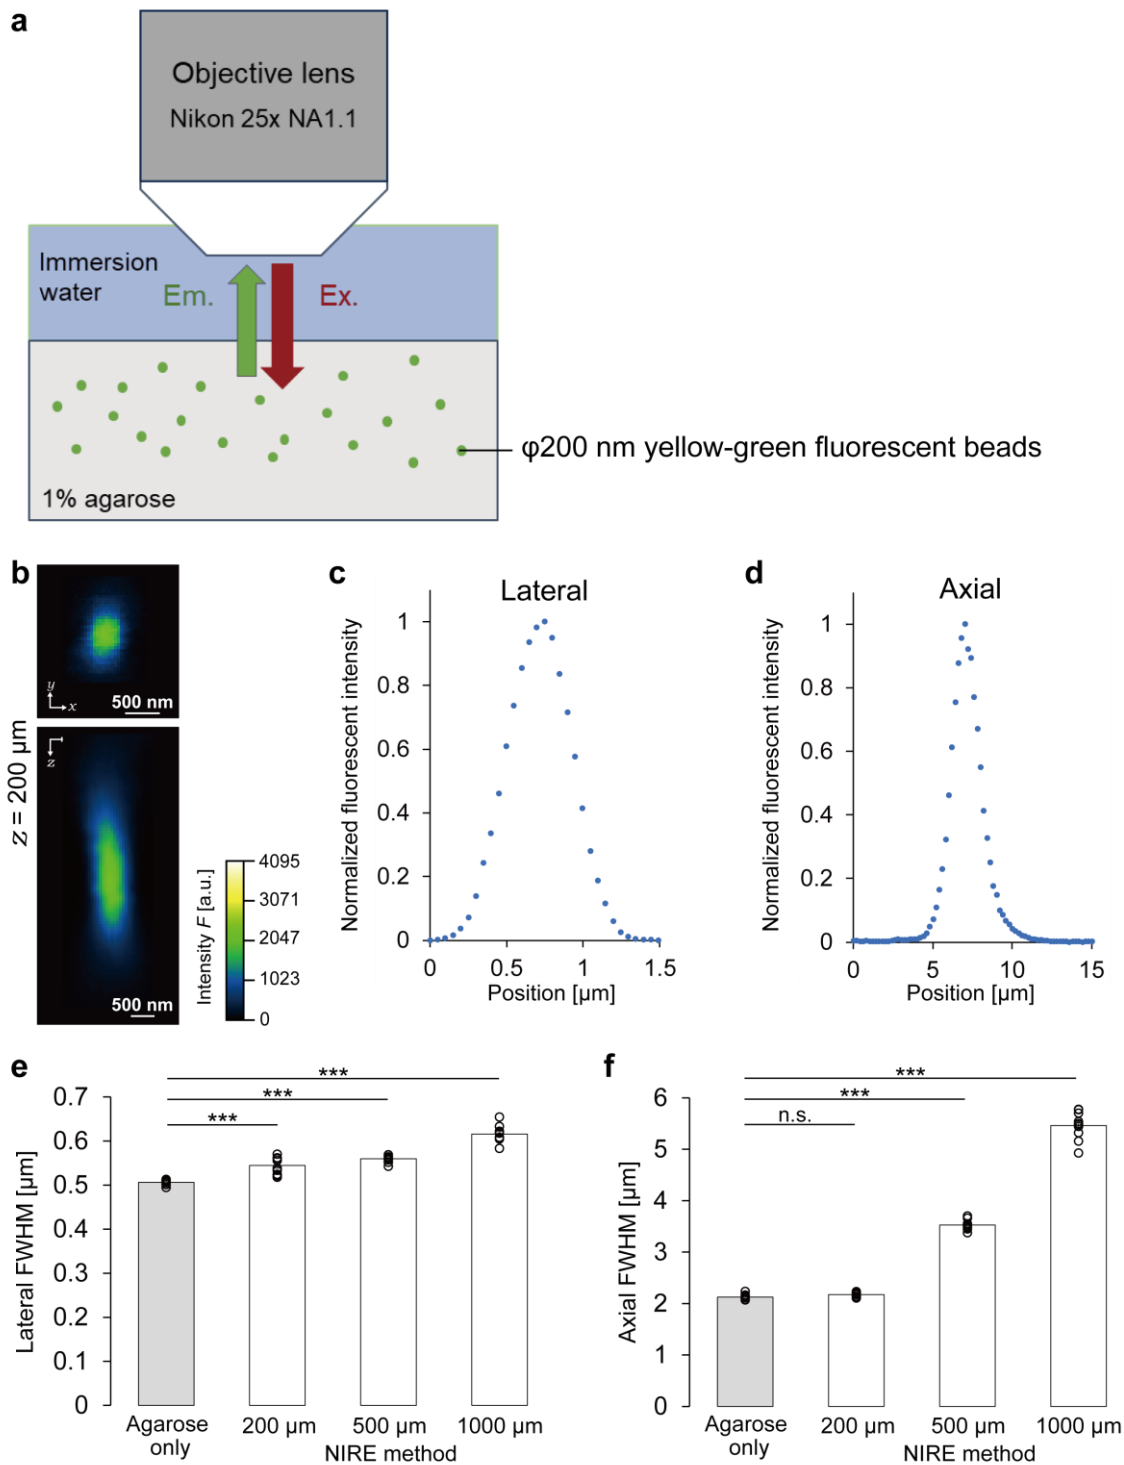

108

109 **Supplementary Figure 5. Evaluation of spatial resolution using**

110 **fluorescent beads in an agarose gel without the light curable resin.**

111

- 112 **a.** Schematic illustration of the measurement for evaluation of the spatial  
113 resolution without any sealing materials.
- 114 **b.** Fluorescence images of 200-nm yellow-green beads at a depth of 200  $\mu\text{m}$   
115 acquired without any sealing materials. Top image: xy plane. Bottom image:  
116 xz plane.
- 117 **c.** Lateral normalized fluorescence intensity of 200-nm yellow-green beads at a  
118 depth of 200  $\mu\text{m}$  acquired through a PEO-CYTOP nanosheet and light-  
119 curable resin.
- 120 **d.** Axial normalized fluorescence intensity of 200-nm yellow-green beads at a  
121 depth of 200  $\mu\text{m}$  acquired through a PEO-CYTOP nanosheet and light-  
122 curable resin.
- 123 **e.** Average lateral FWHMs measured from the intensity profiles of bead images  
124 at depths of 200  $\mu\text{m}$  without any sealing materials and 200, 500, and 1000  
125  $\mu\text{m}$  of Supplementary Fig.4; \*\*\* $p < 0.005$  by Welch's t-test with Bonferroni  
126 correction. Error bars represent standard error of the mean.
- 127 **f.** Average axial FWHMs measured from the intensity profiles of bead images  
128 at depths of 200  $\mu\text{m}$  without any sealing materials and 200, 500, and 1000  
129  $\mu\text{m}$  of Supplementary Fig.4; \*\*\* $p < 0.005$  by Welch's t-test with Bonferroni  
130 correction. Error bars represent standard error of the mean.

131

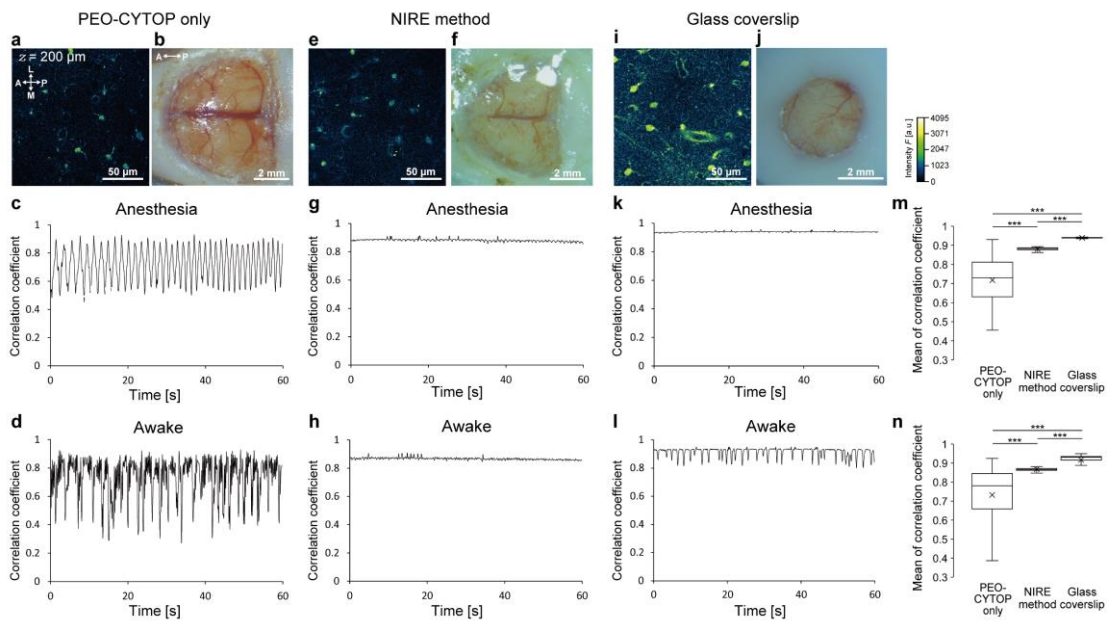

132

133 **Supplementary Figure 6. Evaluation of motion artifacts in an awake**

134 **mouse with cranial windows produced using the NIRE method.**

135 **a.** Example two-photon image of SR101-labeled astrocytes acquired through a  
 136 cranial window consisting of a PEO-CYTOP nanosheet. The directions are  
 137 indicated as anterior (A), posterior (P), medial (M), and lateral (L).

138 **b.** The cranial window consisting of a PEO-CYTOP nanosheet on primary visual  
 139 cortex (V1) of an adult wild-type mouse (same mouse as in **a**).

140 **c.** Time series of a correlation coefficient calculated from each frame in the  
 141 anesthetized condition.

142 **d.** Time series of a correlation coefficient calculated from each frame in the  
 143 awake condition.

144 **e.** Example two-photon image of SR101-labeled astrocytes obtained through a  
 145 cranial window using the NIRE method (same mouse as in **a**).

146 **f.** A cranial window over V1 area produced using the NIRE method (same  
 147 mouse as in **a**).

- 148 **g.** Time series of a correlation coefficient calculated from each frame in the  
149 anesthetized condition.
- 150 **h.** Time series of a correlation coefficient calculated from each frame in the  
151 awake condition.
- 152 **i.** Example two-photon image of SR101-labeled astrocytes obtained through a  
153 cranial window using the glass coverslip.
- 154 **j.** A cranial window using a glass coverslip with a diameter of 4.2 mm over V1  
155 area (same mouse as in **i**).
- 156 **k.** Time series of a correlation coefficient calculated from each frame in the  
157 anesthetized condition.
- 158 **l.** Time series of a correlation coefficient calculated from each frame in the  
159 awake condition.
- 160 **m.** Mean of correlation coefficients for each sealing material under anesthesia;  
161 \*\*\* $p < 0.005$  by Welch's t-test with Bonferroni correction.
- 162 **n.** Mean of correlation coefficients for each sealing material in the awake state;  
163 \*\*\* $p < 0.005$  by Welch's t-test with Bonferroni correction.
- 164 Nikon Apo LWD 25×/1.10 NA water-immersion objective lens was used in (**a**), (**e**),  
165 (**i**).  
166  
167

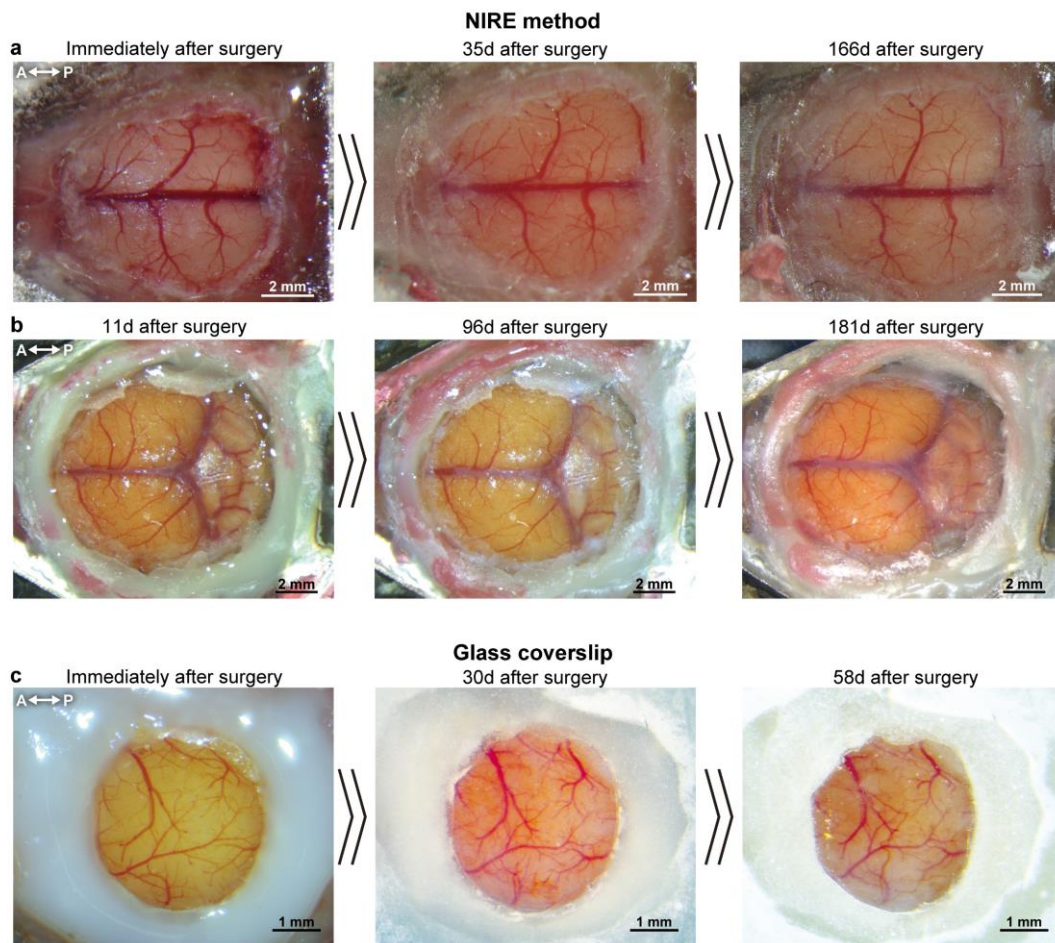

168

169 **Supplementary Figure 7. Time-lapse photographs of the cranial**  
 170 **window using the NIRE method or a glass coverslip.**

171 **a.** Time-lapse photographs of the large cranial window in Figure 3-5 up to 166  
 172 days after surgery. The directions are indicated as anterior (A), and posterior  
 173 (P).

174 **b.** Time-lapse photographs of the large cranial window in Figure 6 up to 181  
 175 days after surgery. The directions are indicated as anterior (A), and posterior  
 176 (P).

177 **c.** Time-lapse photographs of the small cranial window using a glass coverslip  
178 with 4.2 mm diameter up to 58 days after surgery. The directions are  
179 indicated as anterior (A), and posterior (P).  
180

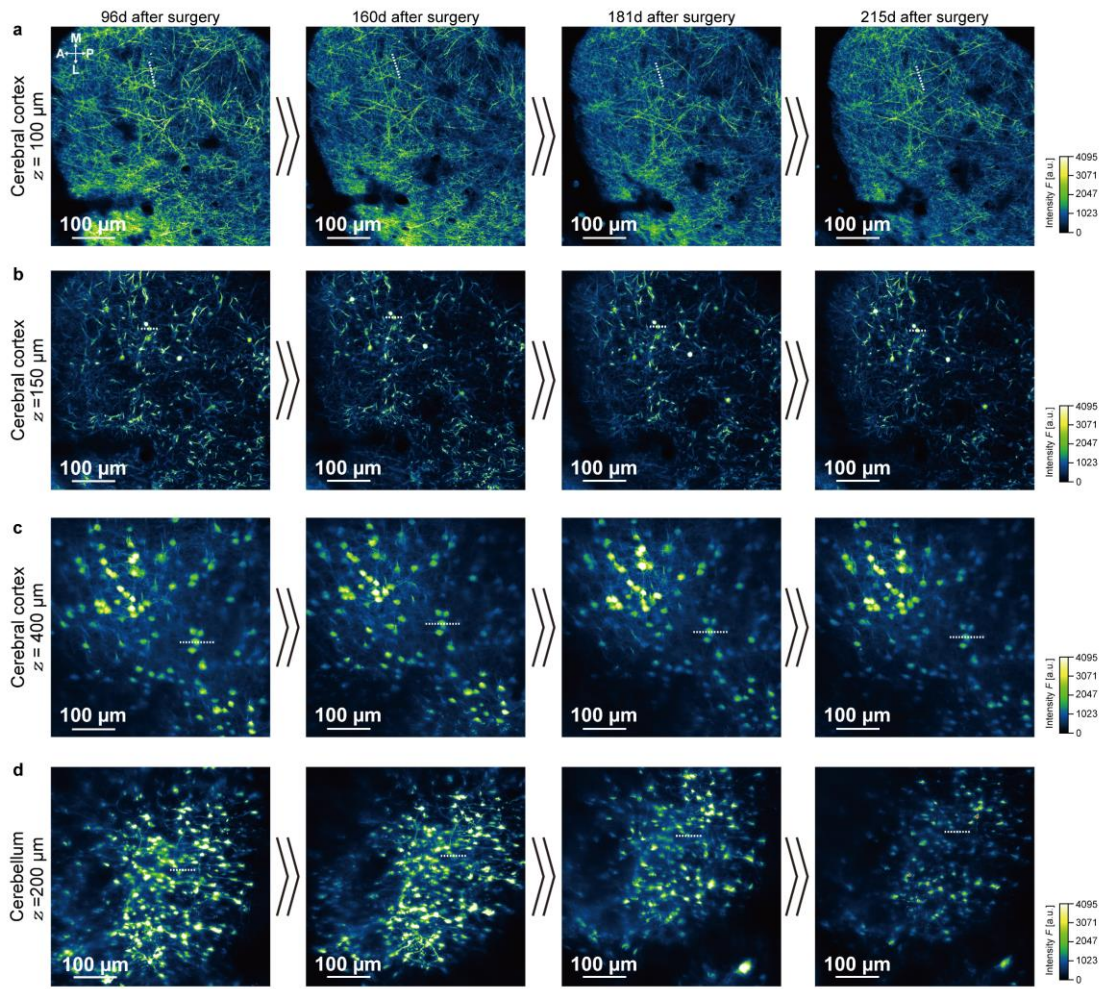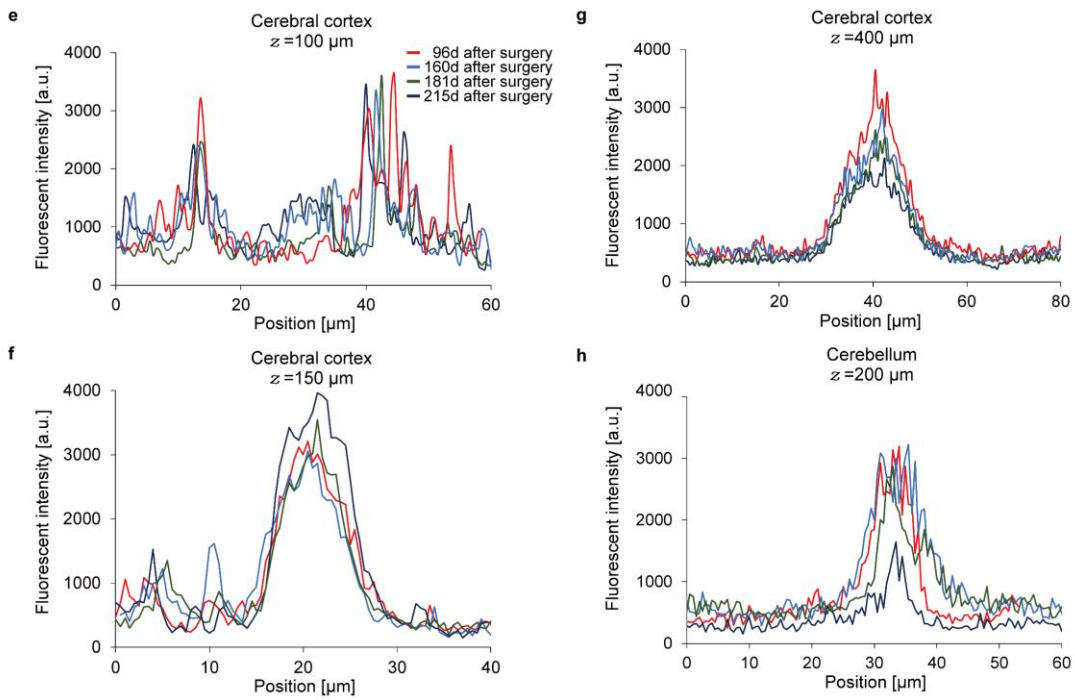



182 **Supplementary Figure 8. Evaluation of fluorescent intensities in**  
183 **different depths through cranial windows produced using the NIRE**  
184 **method.**

185 **a.** Time-lapse fluorescent images of the neurons in the cerebral cortex at the  
186 depth of 100  $\mu\text{m}$  from the same mouse as in Fig. 6. The white dotted lines  
187 are indicated for the intensity profiles in **(e)**. The directions are indicated as  
188 anterior (A), posterior (P), medial (M), and lateral (L).

189 **b.** Time-lapse fluorescent images of the neurons in the cerebral cortex at the  
190 depth of 150  $\mu\text{m}$  from the same mouse as in Fig. 6. The white dotted lines  
191 are indicated for the intensity profiles in **(f)**.

192 **c.** Time-lapse fluorescent images of the neurons in the cerebral cortex at the  
193 depth of 400  $\mu\text{m}$  from the same mouse as in Fig. 6. The white dotted lines  
194 are indicated for the intensity profiles in **(g)**.

195 **d.** Time-lapse fluorescent images of the neurons in the cerebellum at the depth  
196 of 200  $\mu\text{m}$  from the same mouse as in Fig. 6. The white dotted lines are  
197 indicated for the intensity profiles in **(h)**.

198 **e.** Fluorescence intensity profiles across the dendrites in the cerebral cortex  
199 indicated with lines in **(a)**.

200 **f.** Fluorescence intensity profiles across the soma of the neuron in the cerebral  
201 cortex indicated with lines in **(b)**.

202 **g.** Fluorescence intensity profiles across the soma of the neuron in the cerebral  
203 cortex indicated with lines in **(c)**.

204 **h.** Fluorescence intensity profiles across the soma of the neuron in the  
205 cerebellum indicated with lines in **(d)**.

206 Nikon Apo LWD 25×/1.10 NA water-immersion objective lens was used in (a)- (d).

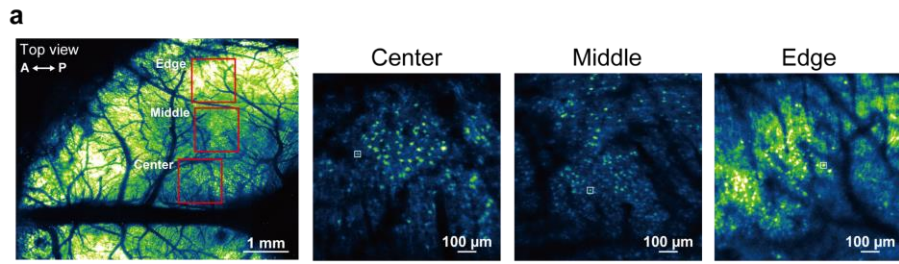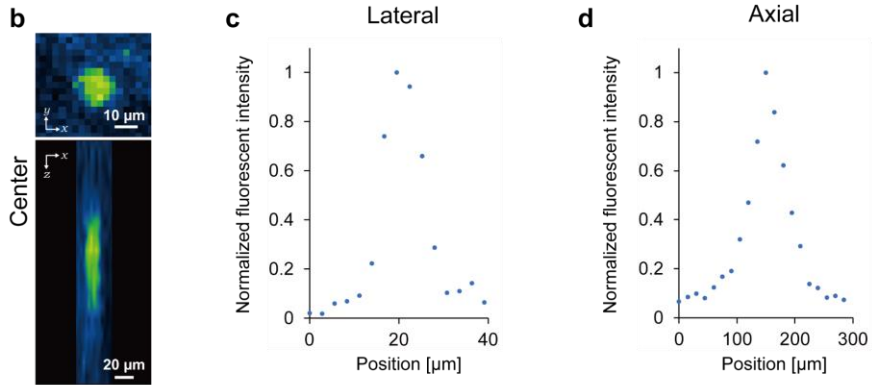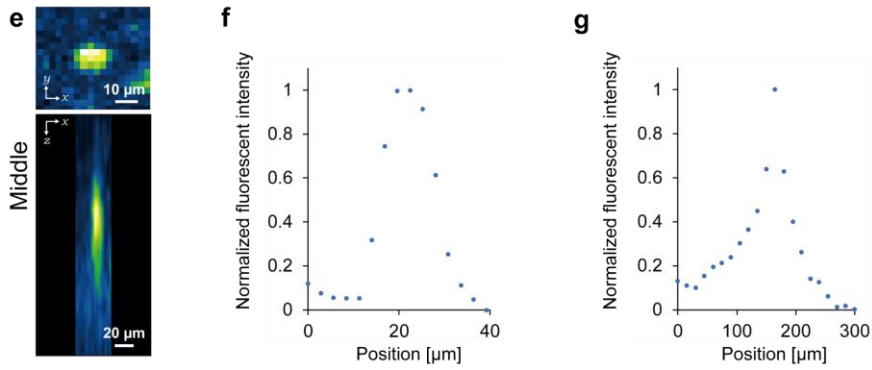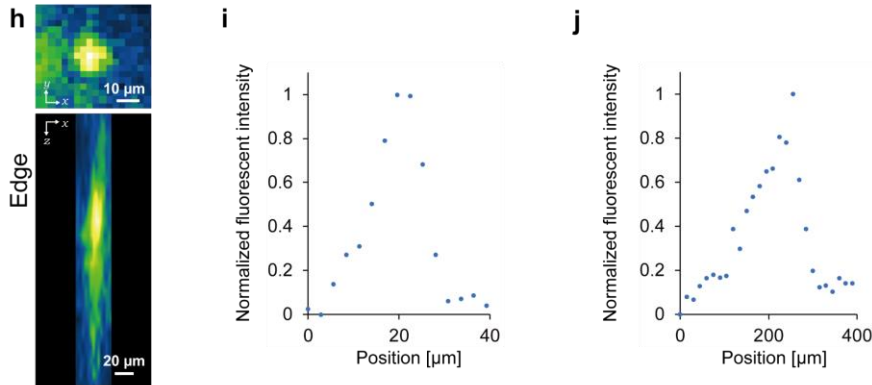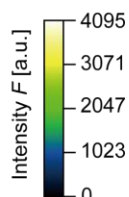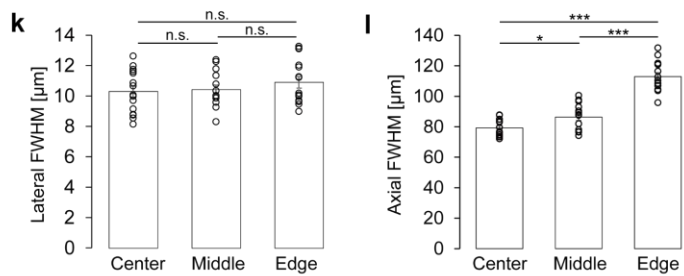

208 **Supplementary Figure 9. Evaluation of the spatial resolution of the**  
209 **neurons through the large cranial window from the cerebral cortex to**  
210 **the cerebellum.**

211 **a.** Fluorescence image indicating each region of the target for the FWHM  
212 measurements using the same mouse as in Fig. 6. The directions are  
213 indicated as anterior (A) and posterior (P).

214 **b.** Fluorescence images of single neurons at the center of the large cranial  
215 window produced using the NIRE method indicated in (a). Top image: xy  
216 plane. Bottom image: xz plane.

217 **c.** Lateral normalized fluorescence intensity of single neurons at the center of  
218 the large cranial window produced using the NIRE method.

219 **d.** Axial normalized fluorescence intensity of single neurons at the center of the  
220 large cranial window produced using the NIRE method.

221 **e.** Fluorescence images of single neurons at the middle of the large cranial  
222 window produced using the NIRE method indicated in (a). Top image: xy  
223 plane. Bottom image: xz plane.

224 **f.** Lateral normalized fluorescence intensity of single neurons at the middle of  
225 the large cranial window produced using the NIRE method.

226 **g.** Axial normalized fluorescence intensity of single neurons at the middle of the  
227 large cranial window produced using the NIRE method.

228 **h.** Fluorescence images of single neurons at the edge of the large cranial  
229 window produced using the NIRE method indicated in (a). Top image: xy  
230 plane. Bottom image: xz plane.

- 231 **i.** Lateral normalized fluorescence intensity of single neurons at the edge of the  
232 large cranial window produced using the NIRE method.
- 233 **j.** Axial normalized fluorescence intensity of single neurons at the edge of the  
234 large cranial window produced using the NIRE method.
- 235 **k.** Average lateral FWHMs measured from the intensity profiles of single  
236 neurons at the center, middle, and edge of the cranial window; \*\*\* $p < 0.005$   
237 by Welch's t-test with Bonferroni correction. Error bars represent standard  
238 error of the mean.
- 239 **l.** Average axial FWHMs measured from the intensity profiles of single neurons  
240 at the center, middle, and edge of the cranial window; \* $p < 0.05$ , \*\*\* $p < 0.005$   
241 by Welch's t-test with Bonferroni correction. Error bars represent standard  
242 error of the mean.
- 243 Olympus XLFLUOR4X/340 4×/0.28 NA air-immersion objective lens was used  
244 in **(a)**.

| Fig. / Supplementary Fig.          | Laser power (mW) | Imaging depth ( $\mu\text{m}$ ) | Frame per seconds | Excitation wavelength (nm) | Objective lens                    | Fluorescent probe |
|------------------------------------|------------------|---------------------------------|-------------------|----------------------------|-----------------------------------|-------------------|
| Fig. 2b                            | 15               | 0-600                           | 0.5               | 960                        | Olympus XLFLUOR4X/340 4x /0.28 NA | EYFP              |
| Fig. 2c-f                          | 9-66             | 100-800                         | 0.5               | 960                        | Nikon CFI75 LWD 25x/0.80 NA       | EYFP              |
| Fig. 4                             | 71               | 150                             | 3.9               | 950                        | Olympus XLFLUOR4X/340 4x /0.28 NA | jGCaMP7f          |
| Fig. 5                             | 33               | 150                             | 7.7               | 950                        | Nikon Apo LWD 25x/1.10 NA         | jGCaMP7f          |
| Fig. 6b, Supplementary Fig. 9      | 13-58            | 0-600                           | 0.5               | 960                        | Olympus XLFLUOR4X/340 4x /0.28 NA | EYFP              |
| Fig. 6c,d, Supplementary Fig. 8a-c | 7-54             | 100-400                         | 0.5               | 960                        | Nikon Apo LWD 25x/1.10 NA         | EYFP              |
| Fig. 6e,f, Supplementary Fig. 8d   | 70               | 200                             | 0.5               | 960                        | Nikon Apo LWD 25x/1.10 NA         | EYFP              |
| Supplementary Fig. 6               | 20               | 200                             | 7.7               | 960                        | Nikon Apo LWD 25x/1.10 NA         | SR101             |

245

246 **Supplementary Table 1:** The parameters used in each figure to perform *in vivo*  
247 imaging.

248
